# Supplementary material for: Spatial variations of soil seed banks in Shanghai’s urban wasteland: a gradient analysis of urbanization effects
Source: PeerJ. 2024 Dec 23;12:e18764. doi: 10.7717/peerj.18764 (PMC11670764; doi:10.7717/peerj.18764)
Supplement: Supplemental Information 4 [file peerj-12-18764-s004.xlsx]

## Sheet: Sheet1
sites	gradients	pH	SHN(mg/kg)	SAP(mg/kg)	seed density_autumn(Seeds/m2)	seed density_spring(Seeds/m2)
13	R	8.70842	119.61	10.6516	1493.89	280
9	R	7.97846	121.568	7.90357	2274.79	533.333
12	R	7.8075	125.624	8.67905	4651.43	1693.33
21	R	8.35071	83.6318	11.8024	1527.84	913.333
24	S	8.39091	53.7208	7.64708	2308.74	433.333
8	S	8.0437	71.3533	8.92381	950.657	866.667
11	S	8.2368	137.085	10.6167	4244	606.667
18	S	8.03786	65.9737	9.84111	5500.23	366.667
10	S	8.24923	133.61	9.21381	1935.27	1213.33
19	S	7.99882	130.855	9.46	1120.42
1	S	8.48	481	10.1		2380
2	S	8.16621	121.561	8.14167		1033.33
20	S	8.11786	56.39	8.97818	4108.19	880
17	S	8.30105	117.348	10.5465	577.184	733.333
16	S	8.3124	52.902	8.0408	1086.46	1113.33
14	S	8.06	363.427	5.18	2580.35	526.667
15	S	8.31643	98.9121	8.82833	950.657
6	U	8.13529	76.144	8.56724	1663.65	1140
23	U	8.35556	168.268	9.17211	2138.98	486.667
3	U	8.02276	104.636	10.0475	1154.37	406.667
22	U	8.17	72.0833	15.7325	2851.97
7	U	7.863	109.325	7.836	13512.9	213.333
4	U	8.14111	91.2167	8.943	950.657
5	U	8.09154	109.327	10.8895	1459.94	933.333
